# Supplementary material for: Chaetoceros resting spores record low diatom-bound nitrogen isotope values: Evidence from laboratory culture and marine sediment
Source: Copernicus journal article supplement (doi:10.5194/egusphere-2023-2564), 2023-11-16
Supplement: Supplementary file 1 [file egusphere-2023-2564-supplement.zip]

Supplement to  
***Chaetoceros* resting spores record low diatom-bound  
nitrogen isotope values: Evidence from laboratory culture  
and marine sediment**

5 Isabel A. Dove et al.

**S1. Description of laboratory culture experiments and data collected**

10 Experiment 1 took place from December 2, 2020 through January 14, 2021. Vegetative cells were harvested on day 9 and CRS were harvested on day 43. Fluorescence, dissolved nitrate concentration, and  $\delta^{15}\text{N}_{\text{NO}_3}$  were measured throughout the experiment, and water samples were periodically inspected and preserved in a 2% acid Lugol's solution to monitor resting spore abundance.

15 Experiment 2 took place from June 23, 2021 through July 21, 2021. Vegetative cells were harvested on day 7 and CRS were harvested on day 28. The same measurements were taken as from experiment 1, in addition to ammonium and dissolved silica concentrations.

Experiment 3 took place from February 17, 2022 through March 25, 2022. Vegetative cells were harvested on day 6 and CRS were harvested on day 36. All measurements are described in the main text.

**Data Table S1.** Data collected throughout experiment 1.

20 **Data Table S2.** Data collected throughout experiment 2.

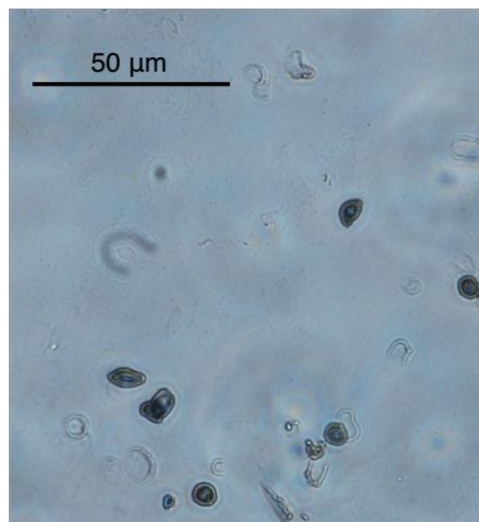

25 **Figure S1.** Photomicrograph of isolated CRS from experiment 3.

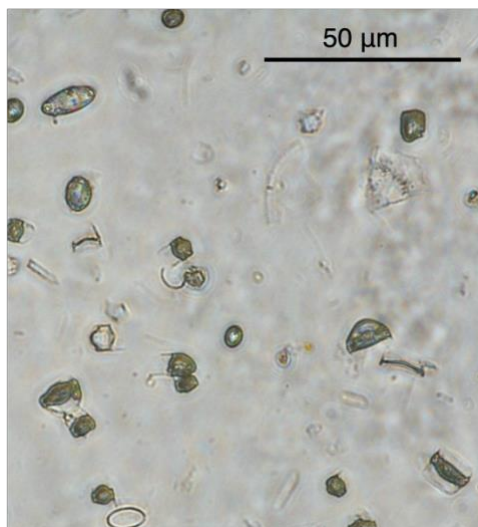

**Figure S2.** Photomicrograph of the <10  $\mu\text{m}$  fraction from ODP Site 1098 sediment. Both vegetative *Chaetoceros* and CRS are present.

30

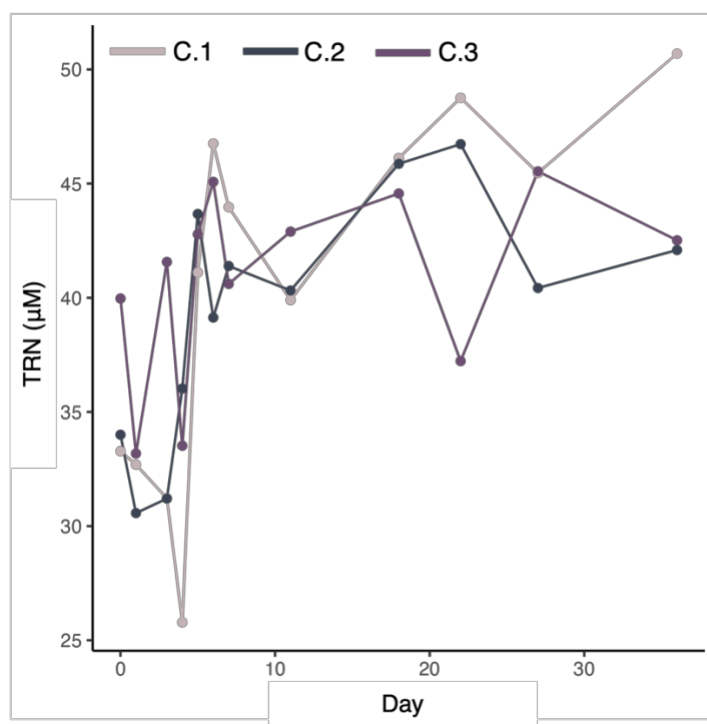

**Figure S3.** Total reduced nitrogen (TRN) concentrations in each carboy throughout experiment 3.

35 **Table S1.**  $\delta^{15}\text{N}_{\text{biomass}}$  and  $\delta^{15}\text{N}_{\text{DB}}$  measurements from experiments 1 and 2.

| Experiment | Carboy | Type       | $\delta^{15}\text{N}_{\text{biomass}}$<br>(‰) | $\delta^{15}\text{N}_{\text{DB}}$<br>(‰) |
|------------|--------|------------|-----------------------------------------------|------------------------------------------|
| 1          | 1      | Vegetative | $9.1 \pm 0.3$                                 | $11.0 \pm 0.3$                           |
| 1          | 2      | Vegetative | $8.5 \pm 0.3$                                 | $11.3 \pm 0.2$                           |
| 1          | 3      | Vegetative | $8.6 \pm 0.2$                                 | $11.6 \pm 0.3$                           |
| 1          | 1      | Mixed      | $8.3 \pm 0.3$                                 |                                          |
| 1          | 2      | Mixed      | $7.5 \pm 0.3$                                 |                                          |
| 1          | 3      | Mixed      | $7.5 \pm 0.3$                                 | $10.2 \pm 0.4$                           |
| 2          | 1      | Vegetative | $8.5 \pm 0.0$                                 | $11.7 \pm 0.1$                           |
| 2          | 2      | Vegetative | $8.3 \pm 0.3$                                 | $7.6 \pm 0.1$                            |
| 2          | 3      | Vegetative | $8.3 \pm 0.3$                                 | $10.8 \pm 1.4$                           |
| 2          | 1      | Mixed      | $7.7 \pm 0.3$                                 | $11.8 \pm 0.0$                           |
| 2          | 2      | Mixed      | $8.4 \pm 0.3$                                 | $9.5 \pm 0.2$                            |
| 2          | 3      | Mixed      | $7.3 \pm 0.3$                                 | $7.9 \pm 0.1$                            |

### S2. Reduced N assimilation does not explain low $\delta^{15}\text{N}_{\text{DB}}$ values for CRS

A mass balance calculation is used to determine whether assimilation of reduced nitrogen with a low  $\delta^{15}\text{N}$  value explains the low  $\delta^{15}\text{N}_{\text{DB}}$  values measured in CRS relative to  $\delta^{15}\text{N}_{\text{DB}}$  values measured in vegetative cells.

40 
$$\Delta\delta^{15}\text{N}_{\text{DB-CRS}} = \delta^{15}\text{N}_{\text{NO}_3} * (1-x) + \delta^{15}\text{N}_{\text{TRN}} * (x)$$

$$-4.4\text{‰} = 9.6\text{‰} * (1-x) + -2\text{‰} * (x)$$

45 Using the average  $\delta^{15}\text{N}_{\text{NO}_3}$  value, a conservative estimate of a representative  $\delta^{15}\text{N}_{\text{TRN}}$  value, and the smallest reasonable  $\Delta\delta^{15}\text{N}_{\text{DB}}$  value ( $-7.0 + 2.6\text{‰}$ ), we find that  $x=1.2$ . This calculation implies that 120% of nutrient-nitrogen assimilated by CRS would have to be reduced N in order to explain why CRS have a  $\delta^{15}\text{N}_{\text{DB}}$  value 4.4‰ lower than that of vegetative *Chaetoceros*. Since this is physically impossible, another explanation for low  $\delta^{15}\text{N}_{\text{DB-CRS}}$  values is required.

### S3. Alternative glacial-interglacial $\varepsilon_{\text{DB}}$ mass balance calculations

50 To ensure that our conclusions from the mass balance calculation of estimated community  $\varepsilon_{\text{DB}}$  values in glacial versus interglacial sediments are not biased by our chosen parameter of two-dimensional diatom surface area, we perform the same calculation using three-dimensional diatom surface area and diatom biovolume. We also repeat the calculation using two-dimensional diatom surface area estimates from another source: Cornet-Barthaux et al. (2007). Each calculation yields similar results and leads to the conclusion that, within the two sediment cores we examine, changes in CRS relative abundance between  
55 glacial-interglacial cycles will not meaningfully bias downcore  $\delta^{15}\text{N}_{\text{DB}}$  records.

**Table S2.** Mass balance calculation of estimated community  $\epsilon_{DB}$  values in glacial versus interglacial sediments using three-dimensional surface area (SA) estimates from Leblanc et al. (2012). The non-CRS  $\epsilon_{DB}$  estimate is from Robinson et al. (2020). We assume that other diatoms comprise 10% of total diatom SA in all cases.

|                                                            |                                                | $\epsilon_{\text{DB}}$ (‰) | Avg. SA<br>( $\mu\text{m}^2$ ) | SA (%) |
|------------------------------------------------------------|------------------------------------------------|----------------------------|--------------------------------|--------|
| TN057-13-PC4                                               |                                                |                            |                                |        |
| Glacial                                                    | CRS                                            | 2.4                        | 363                            | 4      |
|                                                            | <i>E. antarctica</i>                           | -3.2                       | 6784                           | 33     |
|                                                            | <i>F. kerguelensis</i>                         | -3.2                       | 1780                           | 14     |
|                                                            | <i>T. lentiginosa</i>                          | -3.2                       | 17944                          | 40     |
|                                                            | Other diatoms                                  | -3.2                       |                                | 10     |
|                                                            | Estimated community $\epsilon_{\text{DB}}$ (‰) |                            |                                | -3.0   |
| Interglacial                                               | CRS                                            | 2.4                        | 363                            | 0      |
|                                                            | <i>E. antarctica</i>                           | -3.2                       | 6784                           | 4      |
|                                                            | <i>F. kerguelensis</i>                         | -3.2                       | 1780                           | 31     |
|                                                            | <i>T. lentiginosa</i>                          | -3.2                       | 17944                          | 55     |
|                                                            | Other diatoms                                  | -3.2                       |                                | 10     |
|                                                            | Estimated community $\epsilon_{\text{DB}}$ (‰) |                            |                                | -3.2   |
| Glacial-interglacial $\epsilon_{\text{DB}}$ difference (‰) |                                                |                            |                                | 0.2    |
| MD11-3353                                                  |                                                |                            |                                |        |
| Glacial                                                    | CRS                                            | 2.4                        | 363                            | 0      |
|                                                            | <i>E. antarctica</i>                           | -3.2                       | 6784                           | 5      |
|                                                            | <i>F. kerguelensis</i>                         | -3.2                       | 1780                           | 10     |
|                                                            | <i>T. lentiginosa</i>                          | -3.2                       | 17944                          | 75     |
|                                                            | Other diatoms                                  | -3.2                       |                                | 10     |
|                                                            | Estimated community $\epsilon_{\text{DB}}$     |                            |                                | -3.2   |
| Interglacial                                               | CRS                                            | 2.4                        | 363                            | 0      |
|                                                            | <i>E. antarctica</i>                           | -3.2                       | 6784                           | 6      |
|                                                            | <i>F. kerguelensis</i>                         | -3.2                       | 1780                           | 19     |
|                                                            | <i>T. lentiginosa</i>                          | -3.2                       | 17944                          | 64     |
|                                                            | Other diatoms                                  | -3.2                       |                                | 10     |
|                                                            | Estimated community $\epsilon_{\text{DB}}$     |                            |                                | -3.2   |
| Glacial-interglacial $\epsilon_{\text{DB}}$ difference (‰) |                                                |                            |                                | 0.0    |

65

**Table S3.** Mass balance calculation of estimated community  $\epsilon_{DB}$  values in glacial versus interglacial sediments using biovolume (V) estimates from Leblanc et al. (2012). The non-CRS  $\epsilon_{DB}$  estimate is from Robinson et al. (2020). We assume that other diatoms comprise 10% of total diatom V in all cases.

|                                                            |                                                | $\epsilon_{\text{DB}}$ (‰) | Avg. V ( $\mu\text{m}^3$ ) | V (%) |
|------------------------------------------------------------|------------------------------------------------|----------------------------|----------------------------|-------|
| TN057-13-PC4                                               |                                                |                            |                            |       |
| Glacial                                                    | CRS                                            | 2.4                        | 2000                       | 3     |
|                                                            | <i>E. antarctica</i>                           | -3.2                       | 40457                      | 27    |
|                                                            | <i>F. kerguelensis</i>                         | -3.2                       | 5023                       | 5     |
|                                                            | <i>T. lentiginosa</i>                          | -3.2                       | 171958                     | 54    |
|                                                            | Other diatoms                                  | -3.2                       |                            | 10    |
|                                                            | Estimated community $\epsilon_{\text{DB}}$ (‰) |                            |                            | -3.0  |
| Interglacial                                               | CRS                                            | 2.4                        | 2000                       | 0     |
|                                                            | <i>E. antarctica</i>                           | -3.2                       | 40457                      | 3     |
|                                                            | <i>F. kerguelensis</i>                         | -3.2                       | 5023                       | 12    |
|                                                            | <i>T. lentiginosa</i>                          | -3.2                       | 171958                     | 74    |
|                                                            | Other diatoms                                  | -3.2                       |                            | 10    |
|                                                            | Estimated community $\epsilon_{\text{DB}}$ (‰) |                            |                            | -3.2  |
| Glacial-interglacial $\epsilon_{\text{DB}}$ difference (‰) |                                                |                            |                            | 0.2   |
| MD11-3353                                                  |                                                |                            |                            |       |
| Glacial                                                    | CRS                                            | 2.4                        | 2000                       | 0     |
|                                                            | <i>E. antarctica</i>                           | -3.2                       | 40457                      | 3     |
|                                                            | <i>F. kerguelensis</i>                         | -3.2                       | 5023                       | 3     |
|                                                            | <i>T. lentiginosa</i>                          | -3.2                       | 171958                     | 83    |
|                                                            | Other diatoms                                  | -3.2                       |                            | 10    |
|                                                            | Estimated community $\epsilon_{\text{DB}}$     |                            |                            | -3.2  |
| Interglacial                                               | CRS                                            | 2.4                        | 2000                       | 0     |
|                                                            | <i>E. antarctica</i>                           | -3.2                       | 40457                      | 5     |
|                                                            | <i>F. kerguelensis</i>                         | -3.2                       | 5023                       | 7     |
|                                                            | <i>T. lentiginosa</i>                          | -3.2                       | 171958                     | 78    |
|                                                            | Other diatoms                                  | -3.2                       |                            | 10    |
|                                                            | Estimated community $\epsilon_{\text{DB}}$     |                            |                            | -3.2  |
| Glacial-interglacial $\epsilon_{\text{DB}}$ difference (‰) |                                                |                            |                            | 0     |

**Table S4.** Mass balance calculation of estimated community  $\epsilon_{DB}$  values in glacial versus interglacial sediments using two-dimensional surface area (SA) estimates from Cornet-Barthaux et al. (2007). The non-CRS  $\epsilon_{DB}$  estimate is from Robinson et al. (2020). We assume that other diatoms comprise 10% of total diatom SA in all cases.

|                                                            |                                                | $\epsilon_{\text{DB}}$ (‰) | Avg. SA<br>( $\mu\text{m}^2$ ) | SA (%) |
|------------------------------------------------------------|------------------------------------------------|----------------------------|--------------------------------|--------|
| TN057-13-PC4                                               |                                                |                            |                                |        |
| Glacial                                                    | CRS                                            | 2.4                        | 199                            | 8      |
|                                                            | <i>E. antarctica</i>                           | -3.2                       | 1082                           | 21     |
|                                                            | <i>F. kerguelensis</i>                         | -3.2                       | 1074                           | 34     |
|                                                            | <i>T. lentiginosa</i>                          | -3.2                       | 2818                           | 26     |
|                                                            | Other diatoms                                  | -3.2                       |                                | 10     |
|                                                            | Estimated community $\epsilon_{\text{DB}}$ (‰) |                            |                                | -2.7   |
| Interglacial                                               | CRS                                            | 2.4                        | 199                            | 1      |
|                                                            | <i>E. antarctica</i>                           | -3.2                       | 1082                           | 2      |
|                                                            | <i>F. kerguelensis</i>                         | -3.2                       | 1074                           | 60     |
|                                                            | <i>T. lentiginosa</i>                          | -3.2                       | 2818                           | 27     |
|                                                            | Other diatoms                                  | -3.2                       |                                | 10     |
|                                                            | Estimated community $\epsilon_{\text{DB}}$ (‰) |                            |                                | -3.1   |
| Glacial-interglacial $\epsilon_{\text{DB}}$ difference (‰) |                                                |                            |                                | 0.4    |
| MD11-3353                                                  |                                                |                            |                                |        |
| Glacial                                                    | CRS                                            | 2.4                        | 199                            | 1      |
|                                                            | <i>E. antarctica</i>                           | -3.2                       | 1082                           | 4      |
|                                                            | <i>F. kerguelensis</i>                         | -3.2                       | 1074                           | 28     |
|                                                            | <i>T. lentiginosa</i>                          | -3.2                       | 2818                           | 57     |
|                                                            | Other diatoms                                  | -3.2                       |                                | 10     |
|                                                            | Estimated community $\epsilon_{\text{DB}}$     |                            |                                | -3.1   |
| Interglacial                                               | CRS                                            | 2.4                        | 199                            | 1      |
|                                                            | <i>E. antarctica</i>                           | -3.2                       | 1082                           | 4      |
|                                                            | <i>F. kerguelensis</i>                         | -3.2                       | 1074                           | 45     |
|                                                            | <i>T. lentiginosa</i>                          | -3.2                       | 2818                           | 40     |
|                                                            | Other diatoms                                  | -3.2                       |                                | 10     |
|                                                            | Estimated community $\epsilon_{\text{DB}}$     |                            |                                | -3.2   |
| Glacial-interglacial $\epsilon_{\text{DB}}$ difference (‰) |                                                |                            |                                | 0.1    |

### Supplementary material references

- 75 Cornet-Barthaux, V., Armand, L., and Quéguiner, B.: Biovolume and biomass estimates of key diatoms in the Southern Ocean, *Aquatic Microbial Ecology*, 48, 295–308, <https://doi.org/10.3354/AME048295>, 2007.
- Leblanc, K., Aristegui, J., Armand, L., Assmy, P., Beker, B., Bode, A., Breton, E., Cornet, V., Gibson, J., Gosselin, M.-P., Kopczynska, E., Marshall, H., Peloquin, J., Piontkovski, S., Poulton, A. J., Quéguiner, B., Schiebel, R., Shipe, R., Stefels, J., Van Leeuwe, M. A., Varela, M., Widdicombe, C., and Yallop, M.: A global diatom database - abundance, biovolume and biomass in the world ocean, *Earth Syst. Sci. Data Discuss*, 5, 147–185, <https://doi.org/10.5194/essdd-5-147-2012>, 2012.
- 80 Robinson, R. S., Jones, C. A., Kelly, R. P., Love, A., Closset, I., Rafter, P. A., and Brzezinski, M.: A Test of the Diatom-Bound Paleopr Tracing the Isotopic Composition of Nutrient-Nitrogen Into Southern Ocean Particles and Sediments, *Global Biogeochem Cycles*, 34, <https://doi.org/10.1029/2019GB006508>, 2020.
