# Supplementary material for: Chaetoceros resting spores record low diatom-bound nitrogen isotope values: Evidence from laboratory culture and marine sediment
Source: Copernicus journal article supplement (doi:10.5194/egusphere-2023-2564), 2023-11-16
Supplement: Supplementary file 2 [file egusphere-2023-2564-supplement.zip]

Archive with 3 entries (3 files):
- Biogeosci_Supp/Biogeosci_Supp_Dove.pdf
- Biogeosci_Supp/ds01.xlsx
- Biogeosci_Supp/ds02.xlsx
