# Supplementary material for: Chaetoceros resting spores record low diatom-bound nitrogen isotope values: Evidence from laboratory culture and marine sediment
Source: Copernicus journal article supplement (doi:10.5194/egusphere-2023-2564), 2023-11-16
Supplement: Supplementary file 2 [file egusphere-2023-2564-supplement.zip › Biogeosci_Supp/ds01.xlsx]

## Sheet: Experiment 1 data
Day	Carboy		Fluor (RFU)		NO3 (μM)	δ15NO3 (‰)
0	1		3.07		47.9941	9.44997
0	2		2.92		48.1508	8.55063
0	3		3.5		46.4356	8.25378
2	1		4.53		38.6115	8.51438
2	2		3.98		42.744	8.53593
2	3		4.2		42.5206	8.9425
3	1		3.53
3	2		2.89
3	3		3.79
5	1		7.23		4.73577	15.9727
5	2		7.01		13.8522	12.7123
5	3		12.9		0
7	1		21.2
7	2		20.2
7	3		17.7
9	1		19.9		0
9	2		18.4		0
9	3		16.1		0
13	1		4.68
13	2		5.03
13	3		4.37
16	1		10.7
16	2		7.66
16	3		4.85
20	1		4.08
20	2		9.9
20	3		3.76
24	1		2.85
24	2		4.51
24	3		2.27
30	1		2.37
30	2		2.55
30	3		1.29
34	1		1.68
34	2		1.87
34	3		1.36
38	1		1.28
38	2		1.59
38	3		1.36
43	1		1.93
43	2		1.99
43	3		1.6
