# Supplementary material for: Chaetoceros resting spores record low diatom-bound nitrogen isotope values: Evidence from laboratory culture and marine sediment
Source: Copernicus journal article supplement (doi:10.5194/egusphere-2023-2564), 2023-11-16
Supplement: Supplementary file 2 [file egusphere-2023-2564-supplement.zip › Biogeosci_Supp/ds02.xlsx]

## Sheet: Experiment 2 data
Day	Carboy		Fluor (RFU)		NO3 (μM)	δ15NO3 (‰)		NH4 (μM)		dSi (μM)
0	1		1367		54.7772	9.41976		2.18314		76.5287
0	2		783		52.6941	9.09148		0.951979		66.218
0	3		950		46.4684	9.16426		1.88072		63.4685
1	1		1455
1	2		799
1	3		744
2	1		2024		53.5528	9.31395		2.91052		66.9054
2	2		917		51.1823	9.22744		3.1882		67.5928
2	3		1002		51.7777	9.38144		0.683209		66.4471
4	1		7193
4	2		2407
4	3		2750
5	1		16599		15.5759	13.6552		2.66035		64.7
5	2		6173		39.5162	10.5395		0.457022		69.4
5	3		5320		18.7021	15.2846		1.86331		68.4
6	1		43965		0
6	2		13853		0
6	3		12970		0
7	1		18659					-0.155651		14.2
7	2		20719					3.30338		58.8
7	3		13167					1.56875		55.2
8	1		21896
8	2		36020
8	3		14442
9	1		19836					0.956614		1.1
9	2		29939					0.0759958		0.4
9	3		10420					1.01898		0.4
13	1		7880					0.610407		0.4
13	2		13657					-0.343338		0.4
13	3		5310					0.815345		0.4
16	1		7124					1.33693		0.4
16	2		13068					1.42367		0.3
16	3		5506					0.0957047		0.3
19	1		8114					0.768827		0.6
19	2		14469					0.440296		0.5
19	3		6047					1.76375		0.4
21	1		5490
21	2		11117
21	3		4190
23	1		6148
23	2		8114
23	3		5358
28	1		2747					3.13029		0.9
28	2		6504					1.50145		0.6
28	3		5200					1.86124		0.4
